# Supplementary material for: Possibilistic response surfaces: incorporating fuzzy thresholds into bottom-up flood vulnerability analysis
Source: Copernicus journal article supplement (doi:10.5194/hess-2020-646), 2021-01-06
Supplement: Supplementary file 5 [file hess-2020-646-supplement.zip]

Archive with 6 entries (6 files):
- supplementary_material/hess-2020-214.pdf
- supplementary_material/hess-2020-214-AC1.pdf
- supplementary_material/hess-2020-214-AC2.pdf
- supplementary_material/hess-2020-214-RC2-supplement.pdf
- supplementary_material/Letter_to_reviewers.pdf
- supplementary_material/manuscript_changes.pdf
